# Supplementary material
Source: publisher figshare collection journal article supplement (https://acs.figshare.com/ndownloader/files/5142085)
Supplement: Supplementary file 1 [file 5142085]

#==============================================================================
data_global
#==============================================================================

# 1. SUBMISSION DETAILS

_publ_contact_author
;
    Dr Yvan Guindon
    Institut de recherches cliniques de Montr\'eal
    110 ouest, Avenue des Pins
    Montr\'eal, Qu\'ebec
    Canada H2W 1R7
;
_publ_contact_author_email    'guindoy@ircm.umontreal.ca'
_publ_contact_author_fax      '514 987 5789'
_publ_contact_author_phone    '514 987 5786'

_publ_requested_journal       'Acta Crystallographica C'
_publ_requested_coeditor_name  'George Ferguson'

_publ_contact_letter         
;
     Please consider this CIF submission for publication as a New Structure
     paper in Acta Crystallographica Section C.  The figures, chemical
     structure diagram (scheme), Transfer of Copyright Agreement form and
     structure factors will be sent on receipt of your e-mail with your
     reference number.
;

#==============================================================================

# 2. PROCESSING SUMMARY (IUCr Office Use Only)

_journal_date_recd_electronic     ?

_journal_date_to_coeditor         ?
_journal_date_from_coeditor       ?
_journal_date_accepted            ?

_journal_date_printers_first      ?
_journal_date_printers_final      ?
_journal_date_proofs_out          ?
_journal_date_proofs_in           ?
   
_journal_coeditor_name            ?
_journal_coeditor_code            ?
_journal_coeditor_notes
; ?
;

_journal_techeditor_code          ?
_journal_techeditor_notes
; ?
;

_journal_coden_ASTM               ?
_journal_name_full                ?
_journal_year                     ?
_journal_volume                   ?
_journal_issue                    ?
_journal_page_first               ?
_journal_page_last                ?

_journal_suppl_publ_number        ?
_journal_suppl_publ_pages         ?

#==============================================================================
# 3. TITLE AND AUTHOR LIST

_publ_section_title
;
GUIN15
;

# The loop structure below should contain the names and addresses of all
# authors, in the required order of publication. Repeat as necessary.

loop_
          _publ_author_name
          _publ_author_address
 

"Guindon, Yvan"
;
Institut de recherches cliniques de Montr\'eal
110 ouest, Avenue des Pins
Montr\'eal, Qu\'ebec
Canada H2W 1R7
;
"Bencheqroun, Mohammed"
;
Institut de recherches cliniques de Montr\'eal
110 ouest, Avenue des Pins
Montr\'eal, Qu\'ebec
Canada H2W 1R7
;
"B\'elanger-Gari\'epy, Francine"
;
D\'epartement de Chimie
Universit\'e de Montr\'eal
C.P. 6128, Succ. Centre-ville,
Montr\'eal, Qu\'ebec
Canada H3C 3J7
;

#==============================================================================

# 4. TEXT

_publ_section_abstract
;
resume
;
_publ_section_comment
;
comment
;
_publ_section_acknowledgements
;
The financial supports of the Natural Sciences and Engineering Research 
Council of Canada and theFonds FCAR du Minist\`ere de 
l'\'Education du Qu\'ebec are gratefully
acknowledged.
;
_publ_section_references
;

Ahmed, F.R., Hall, S.R., Pippy, M.E. and Huber, C. P. (1973).
NRC Crystallographic Computer Programs for the IBM/360.
Accession Nos. 133-147 in  J. Appl. Cryst. 6, 309-346.

Enraf-Nonius (1989). CAD-4 Software.
Version 5.0. Enraf-Nonius, Delft, The Netherlands.

Flack, H.D. (1983). Acta Cryst. A39, 876-881.

Flack, H.D. and Schwarzenbach, D. (1988). Acta Cryst. A44, 499-506.

Gabe, E.J., Le Page, Y., Charland, J.-P., Lee, F.L. and White, P.S. (1989). 
J. Appl. Cryst. 22, 384-387.

International Tables for Crystallography (1992).
Vol. C. Tables 4.2.6.8 and 6.1.1.4, Dordrecht: Kluwer Academic Publishers.

Sheldrick, G.M. (1997). SHELXS97. Program for the Solution of 
Crystal Structures.  Univ. of Gottingen, Germany.

Sheldrick, G.M. (1996). SHELXL96.
Program for the Refinement of Crystal Structures. Univ. of G\"ottingen,
Germany.

SHELXTL (1997) Release 5.10; The Complete Software Package for Single 
Crystal Structure Determination, Bruker AXS Inc., Madison, WI 53719-1173.

Spek, A.L. (1995).  PLATON, Molecular Geometry Program, July 1995 version, 
University of Utrecht, Utrecht, Holland.

;

_publ_section_figure_captions
;

Fig. 1 ORTEP (SHELXTL (1997)) drawing of the molecule.  Ellipsoids correspond to
40% probability. 
;

_publ_section_table_legends
;
;

#=============================================================================
 
data_guin15 
  
_audit_creation_method            'SHELXL96 (Sheldrick, 1996)' 
_chemical_name_systematic 
; 
 ? 
; 
_chemical_name_common             ? 
_chemical_formula_moiety          'C33 H46 O21' 
_chemical_formula_structural      ? 
_chemical_formula_analytical      ? 
_chemical_formula_sum             'C33 H46 O21' 
_chemical_formula_weight          778.698 
_chemical_melting_point           ? 
_chemical_compound_source         'synthesized by the authors, see text' 
  
_publ_section_exptl_prep 
; 
 Synthesis was carried out by reaction of ... 
; 
  
  
loop_ 
 _atom_type_symbol 
 _atom_type_description 
 _atom_type_scat_dispersion_real 
 _atom_type_scat_dispersion_imag 
 _atom_type_scat_source 
 'C'  'C'   0.0181   0.0091 
 'International Tables Vol C Tables 4.2.6.8 and 6.1.1.4' 
 'H'  'H'   0.0000   0.0000 
 'International Tables Vol C Tables 4.2.6.8 and 6.1.1.4' 
 'O'  'O'   0.0492   0.0322 
 'International Tables Vol C Tables 4.2.6.8 and 6.1.1.4' 
  
_symmetry_cell_setting             Monoclinic 
_symmetry_space_group_name_H-M     'P 21' 
  
loop_ 
 _symmetry_equiv_pos_as_xyz 
 'x, y, z' 
 '-x, y+1/2, -z' 
  
_cell_length_a                    8.841(3) 
_cell_length_b                    17.598(6) 
_cell_length_c                    12.876(5) 
_cell_angle_alpha                 90.00 
_cell_angle_beta                  98.67(3) 
_cell_angle_gamma                 90.00 
_cell_volume                      1980.4(12) 
_cell_formula_units_Z             2 
_cell_measurement_temperature     293(2) 
_cell_measurement_reflns_used     25 
_cell_measurement_theta_min       15.00 
_cell_measurement_theta_max       25.00 
  
_exptl_crystal_description        plate 
_exptl_crystal_colour             colourless 
_exptl_crystal_size_max           0.56 
_exptl_crystal_size_mid           0.15 
_exptl_crystal_size_min           0.08 
_exptl_crystal_density_meas       'not measured' 
_exptl_crystal_density_diffrn     1.3059 
_exptl_crystal_density_method     none 
_exptl_crystal_F_000              824.0 
_exptl_absorpt_coefficient_mu     0.947 
_exptl_absorpt_correction_type    integration 
_exptl_absorpt_process_details    'ABSORP in NRCVAX (Gabe et al, 1989)' 
_exptl_absorpt_correction_T_min   0.7951 
_exptl_absorpt_correction_T_max   0.9357 
  
_exptl_special_details 
; 
 ? 
; 
  
_diffrn_ambient_temperature       293(2) 
_diffrn_radiation_wavelength      1.54056 
_diffrn_radiation_type            CuK\a 
_diffrn_radiation_source          'normal-focus xray tube' 
_diffrn_radiation_monochromator   graphite 
_diffrn_measurement_device_type   'Nonius CAD-4' 
_diffrn_measurement_method        '\w scan' 
_diffrn_standards_number          5 
_diffrn_standards_interval_count  ? 
_diffrn_standards_interval_time   60 
_diffrn_standards_decay_%         'no decay, variation  3.6' 
_diffrn_reflns_number             37308 
_diffrn_reflns_av_R_equivalents   0.080 
_diffrn_reflns_av_sigmaI/netI     0.0768 
_diffrn_reflns_limit_h_min        -10 
_diffrn_reflns_limit_h_max        10 
_diffrn_reflns_limit_k_min        -21 
_diffrn_reflns_limit_k_max        21 
_diffrn_reflns_limit_l_min        -15 
_diffrn_reflns_limit_l_max        15 
_diffrn_reflns_theta_min          3.47 
_diffrn_reflns_theta_max          69.83 
_reflns_number_total              7519 
_reflns_number_gt                 3491 
_reflns_threshold_expression      >2\s(I) 
  
_computing_data_collection        'CAD-4 software (Enraf-Nonius, 1989)' 
_computing_cell_refinement        'CAD-4 software (Enraf-Nonius, 1989)' 
_computing_data_reduction         'NRC-2, NRC-2A (Ahmed et al, 1973)' 
_computing_structure_solution     'SHELXS97 (Sheldrick, 1997)' 
_computing_structure_refinement   'SHELXL96 (Sheldrick, 1996)' 
_computing_molecular_graphics     'SHELXTL (Bruker, 1997)' 
_computing_publication_material   'SHELXL96 (Sheldrick, 1996)' 
  
_refine_special_details 
; 
 Refinement of F^2^ against ALL reflections.  Weighted R-factors wR and all 
 goodnesses of fit S are based on F^2^, conventional R-factors R 
 are based on F, with F set to zero for negative F^2^. The observed criterion 
 of F^2^ > 2sigma(F^2^) is used only for calculating  R-factor_obs etc. and is 
 not relevant to the choice of reflections for refinement.  R-factors based 
 on F^2^ are statistically about twice as large as those based on F, and R- 
 factors based on ALL data will be even larger. 
; 
  
_refine_ls_structure_factor_coef  Fsqd 
_refine_ls_matrix_type            full 
_refine_ls_weighting_scheme       calc 
_refine_ls_weighting_details 
 'w=1/[\s^2^(Fo^2^)+(0.0441P)^2^] where P=(Fo^2^+2Fc^2^)/3' 
_atom_sites_solution_primary      direct 
_atom_sites_solution_secondary    difmap 
_atom_sites_solution_hydrogens    geom 
_refine_ls_hydrogen_treatment     constr 
_refine_ls_extinction_method      'SHELXL96 (Sheldrick, 1996)' 
_refine_ls_extinction_coef        0.0052(3) 
_refine_ls_extinction_expression 
 'Fc^*^=kFc[1+0.001xFc^2^\l^3^/sin(2\q)]^-1/4^' 
_refine_ls_abs_structure_details  'Flack (1983)' 
_refine_ls_abs_structure_Flack    0.0(2) 
_refine_ls_number_reflns          7519 
_refine_ls_number_parameters      546 
_refine_ls_number_restraints      712 
_refine_ls_R_factor_all           0.0882 
_refine_ls_R_factor_gt            0.0469 
_refine_ls_wR_factor_all          0.1098 
_refine_ls_wR_factor_ref          0.0954 
_refine_ls_goodness_of_fit_all    0.766 
_refine_ls_goodness_of_fit_ref    1.019 
_refine_ls_restrained_S_all       0.864 
_refine_ls_restrained_S_obs       1.288 
_refine_ls_shift/su_max           0.003 
_refine_ls_shift/su_mean          0.000 
  
_publ_section_exptl_refinement 
; 
 Space group confirmed by PLATON program (Spek, 1995).  Data reduction 
 performed using a locally modified version of the NRC-2 program (Ahmed 
 et al, 1973).  The structure was solved by direct method using SHELXS97 
 (Sheldrick, 1997) and difmap synthesis using SHELXTL (Sheldrick, 1997) 
 and SHELXL96 (Sheldrick, 1996).  All non-hydrogen atoms anisotropic, 
 hydrogen atoms isotropic.  Hydrogen atoms constrained to the parent 
 site using a riding model; SHELXL96 defaults, C-H 0.96 to 0.98\%A. 
 The isotropic factors, Uiso, were adjusted to 50% higher 
 value of the parent site (methyl) and 20% higher (others). 
  
 Two models were found for C20,O20,O21,C22 group and 
 three models for O40,C40,C41 group. SAME/SADI/ISOR were 
 used to help final convergence. 
  
 A final 
 verification of possible voids was performed using the VOID routine 
 of the PLATON program (Spek, 1995). 
; 
  
loop_ 
 _atom_site_label 
 _atom_site_type_symbol 
 _atom_site_fract_x 
 _atom_site_fract_y 
 _atom_site_fract_z 
 _atom_site_U_iso_or_equiv 
 _atom_site_adp_type 
 _atom_site_occupancy 
 _atom_site_calc_flag 
 _atom_site_refinement_flags 
 _atom_site_disorder_group 
C1 C 0.3627(5) 0.3984(2) -0.0464(3) 0.0681(12) Uani 1 d DU . 
H1 H 0.3044 0.3536 -0.0308 0.082 Uiso 1 calc R . 
C17 C 0.3541(6) 0.4037(3) -0.1632(3) 0.0951(18) Uani 1 d DU . 
O17 O 0.2852(5) 0.3621(2) -0.2267(3) 0.1342(16) Uani 1 d DU . 
O18 O 0.4419(4) 0.46080(19) -0.1882(2) 0.1010(12) Uani 1 d DU . 
C19 C 0.4289(8) 0.4709(4) -0.3031(3) 0.152(3) Uani 1 d DU . 
H19A H 0.5014 0.4385 -0.3300 0.229 Uiso 1 calc R . 
H19B H 0.4496 0.5229 -0.3185 0.229 Uiso 1 calc R . 
H19C H 0.3272 0.4579 -0.3356 0.229 Uiso 1 calc R . 
C2 C 0.5255(5) 0.3903(2) 0.0127(3) 0.0655(12) Uani 1 d DU . 
H2 H 0.5864 0.4357 0.0037 0.079 Uiso 0.70 calc PR -1 
H2' H 0.5654 0.4423 0.0125 0.079 Uiso 0.30 calc PR -2 
C20 C 0.5889(7) 0.3216(3) -0.0367(8) 0.077(3) Uani 0.70 d PDU -1 
O20 O 0.5249(8) 0.2628(3) -0.0551(8) 0.100(3) Uani 0.70 d PDU -1 
O21 O 0.7297(7) 0.3360(4) -0.0575(7) 0.090(2) Uani 0.70 d PDU -1 
C22 C 0.8135(10) 0.2738(4) -0.0970(7) 0.132(4) Uani 0.70 d PDU -1 
H22A H 0.8170 0.2314 -0.0498 0.198 Uiso 0.70 calc PR -1 
H22B H 0.9158 0.2900 -0.1020 0.198 Uiso 0.70 calc PR -1 
H22C H 0.7629 0.2589 -0.1652 0.198 Uiso 0.70 calc PR -1 
C20' C 0.6467(13) 0.3446(8) -0.029(2) 0.077(7) Uani 0.30 d PDU -2 
O20' O 0.7738(12) 0.3638(9) -0.0346(17) 0.091(6) Uani 0.30 d PDU -2 
O21' O 0.5879(16) 0.2786(9) -0.068(2) 0.102(6) Uani 0.30 d PDU -2 
C22' C 0.693(2) 0.2299(9) -0.1137(16) 0.118(7) Uani 0.30 d PDU -2 
H22D H 0.7462 0.2592 -0.1598 0.177 Uiso 0.30 calc PR -2 
H22E H 0.6371 0.1898 -0.1528 0.177 Uiso 0.30 calc PR -2 
H22F H 0.7659 0.2084 -0.0587 0.177 Uiso 0.30 calc PR -2 
C3 C 0.5155(5) 0.3763(2) 0.1309(3) 0.0609(11) Uani 1 d . . 
H3A H 0.4774 0.4221 0.1600 0.073 Uiso 1 calc R . 
H3B H 0.4420 0.3361 0.1362 0.073 Uiso 1 calc R . 
C4 C 0.6658(5) 0.3548(2) 0.1961(3) 0.0601(11) Uani 1 d . . 
H4 H 0.7411 0.3928 0.1820 0.072 Uiso 1 calc R . 
C25 C 0.6084(5) 0.5449(2) 0.4232(4) 0.1013(17) Uani 1 d DU . 
H25A H 0.6795 0.5794 0.4623 0.152 Uiso 1 calc R . 
H25B H 0.5387 0.5261 0.4675 0.152 Uiso 1 calc R . 
H25C H 0.5522 0.5710 0.3641 0.152 Uiso 1 calc R . 
C24 C 0.6939(5) 0.4798(2) 0.3850(3) 0.0760(14) Uani 1 d DU . 
O24 O 0.8282(4) 0.4761(2) 0.3906(3) 0.1190(14) Uani 1 d DU . 
O23 O 0.5984(3) 0.42373(14) 0.3474(2) 0.0663(8) Uani 1 d DU . 
C5 C 0.6662(5) 0.35421(17) 0.3147(3) 0.0592(11) Uani 1 d DU . 
H5 H 0.7715 0.3495 0.3510 0.071 Uiso 1 calc R . 
C28 C 0.5186(7) 0.2572(3) 0.6214(3) 0.126(2) Uani 1 d DU . 
H28A H 0.4298 0.2620 0.6556 0.189 Uiso 1 calc R . 
H28B H 0.5906 0.2965 0.6459 0.189 Uiso 1 calc R . 
H28C H 0.5650 0.2084 0.6372 0.189 Uiso 1 calc R . 
C27 C 0.4725(6) 0.2646(3) 0.5053(3) 0.0982(17) Uani 1 d DU . 
O27 O 0.3522(5) 0.2495(3) 0.4570(3) 0.161(2) Uani 1 d DU . 
O26 O 0.5894(4) 0.28848(17) 0.4601(2) 0.0778(9) Uani 1 d DU . 
C6 C 0.5706(5) 0.2889(2) 0.3462(2) 0.0623(11) Uani 1 d DU . 
H6 H 0.4627 0.2969 0.3174 0.075 Uiso 1 calc R . 
C31 C 0.9566(5) 0.1446(3) 0.4937(4) 0.1043(19) Uani 1 d DU . 
H31A H 0.9645 0.1632 0.5644 0.157 Uiso 1 calc R . 
H31B H 1.0203 0.1747 0.4556 0.157 Uiso 1 calc R . 
H31C H 0.9895 0.0926 0.4947 0.157 Uiso 1 calc R . 
C30 C 0.7940(5) 0.1499(2) 0.4413(3) 0.0808(15) Uani 1 d DU . 
O30 O 0.6892(4) 0.11436(19) 0.4653(3) 0.1070(13) Uani 1 d DU . 
O29 O 0.7796(3) 0.20020(15) 0.3613(2) 0.0736(8) Uani 1 d DU . 
C7 C 0.6245(4) 0.2141(2) 0.3084(3) 0.0613(11) Uani 1 d DU . 
H7 H 0.5564 0.1730 0.3236 0.074 Uiso 1 calc R . 
C8 C 0.6289(5) 0.2188(2) 0.1898(3) 0.0629(11) Uani 1 d . . 
H8 H 0.5244 0.2263 0.1534 0.076 Uiso 1 calc R . 
O9 O 0.7209(3) 0.28227(14) 0.16684(19) 0.0618(7) Uani 1 d . . 
O10 O 0.2968(3) 0.46305(14) -0.0040(2) 0.0633(8) Uani 1 d . . 
C11 C 0.1399(5) 0.4685(2) -0.0253(3) 0.0629(12) Uani 1 d . . 
H11 H 0.0933 0.4187 -0.0177 0.075 Uiso 1 calc R . 
C35 C 0.1934(6) 0.4754(3) 0.3318(3) 0.0975(16) Uani 1 d DU . 
H35A H 0.2764 0.4398 0.3361 0.146 Uiso 1 calc R . 
H35B H 0.0988 0.4483 0.3298 0.146 Uiso 1 calc R . 
H35C H 0.2085 0.5081 0.3922 0.146 Uiso 1 calc R . 
C34 C 0.1881(6) 0.5223(2) 0.2338(3) 0.0879(15) Uani 1 d DU . 
O34 O 0.2427(6) 0.5832(2) 0.2286(3) 0.1489(19) Uani 1 d DU . 
O33 O 0.1076(3) 0.48704(14) 0.15134(18) 0.0728(8) Uani 1 d DU . 
C12 C 0.0881(5) 0.5236(2) 0.0496(3) 0.0613(11) Uani 1 d DU . 
H12 H 0.1483 0.5705 0.0522 0.074 Uiso 1 calc R . 
C38 C -0.2487(7) 0.6678(3) 0.2012(4) 0.129(2) Uani 1 d DU . 
H38A H -0.3469 0.6668 0.2244 0.194 Uiso 1 calc R . 
H38B H -0.2418 0.7118 0.1581 0.194 Uiso 1 calc R . 
H38C H -0.1697 0.6698 0.2611 0.194 Uiso 1 calc R . 
C37 C -0.2294(6) 0.5977(3) 0.1388(4) 0.0959(17) Uani 1 d DU . 
O37 O -0.3063(6) 0.5428(3) 0.1360(4) 0.172(2) Uani 1 d DU . 
O36 O -0.1140(4) 0.60453(16) 0.0848(3) 0.0872(10) Uani 1 d DU . 
C13 C -0.0809(5) 0.5405(2) 0.0210(3) 0.0702(12) Uani 1 d DU . 
H13 H -0.1397 0.4963 0.0386 0.084 Uiso 1 calc R . 
C41 C -0.0851(11) 0.7519(4) -0.2008(10) 0.091(5) Uiso 0.42 d PD -1 
H41A H -0.1458 0.7692 -0.2645 0.137 Uiso 0.42 calc PR -1 
H41B H 0.0121 0.7342 -0.2157 0.137 Uiso 0.42 calc PR -1 
H41C H -0.0694 0.7931 -0.1514 0.137 Uiso 0.42 calc PR -1 
C40 C -0.1666(7) 0.6882(4) -0.1548(11) 0.063(4) Uiso 0.42 d PD -1 
O40 O -0.2984(6) 0.6744(5) -0.1811(8) 0.105(3) Uiso 0.42 d PD -1 
O39 O -0.0668(3) 0.63428(14) -0.1145(2) 0.0792(9) Uani 1 d DU . 
C14 C -0.1290(5) 0.5602(2) -0.0941(3) 0.0729(13) Uani 1 d DU . 
H14 H -0.2408 0.5609 -0.1111 0.087 Uiso 1 calc R . 
C41' C -0.1115(15) 0.7609(3) -0.1674(12) 0.064(5) Uiso 0.33 d PD -2 
H41D H -0.1610 0.7904 -0.2254 0.096 Uiso 0.33 calc PR -2 
H41E H -0.0025 0.7652 -0.1636 0.096 Uiso 0.33 calc PR -2 
H41F H -0.1414 0.7794 -0.1033 0.096 Uiso 0.33 calc PR -2 
C40' C -0.1575(11) 0.6793(4) -0.1827(10) 0.077(7) Uiso 0.33 d PD -2 
O40' O -0.2779(8) 0.6575(5) -0.2261(8) 0.084(3) Uiso 0.33 d PD -2 
C41" C -0.0655(16) 0.7666(4) -0.1335(16) 0.073(6) Uiso 0.25 d PD -3 
H41G H -0.1321 0.8099 -0.1365 0.109 Uiso 0.25 calc PR -3 
H41H H -0.0277 0.7613 -0.1992 0.109 Uiso 0.25 calc PR -3 
H41I H 0.0190 0.7735 -0.0780 0.109 Uiso 0.25 calc PR -3 
C40" C -0.1527(11) 0.6961(3) -0.1127(17) 0.070(6) Uiso 0.25 d PD -3 
O40" O -0.2807(9) 0.6954(6) -0.0963(12) 0.097(4) Uiso 0.25 d PD -3 
C15 C -0.0617(5) 0.5005(2) -0.1611(3) 0.0714(13) Uani 1 d . . 
H15 H -0.1090 0.4509 -0.1528 0.086 Uiso 1 calc R . 
O16 O 0.0998(3) 0.49546(14) -0.1304(2) 0.0647(7) Uani 1 d . . 
C32 C 0.6942(6) 0.1491(2) 0.1459(4) 0.0882(16) Uani 1 d . . 
H32A H 0.6900 0.1548 0.0713 0.132 Uiso 1 calc R . 
H32B H 0.6357 0.1054 0.1602 0.132 Uiso 1 calc R . 
H32C H 0.7986 0.1427 0.1781 0.132 Uiso 1 calc R . 
C45 C -0.0004(8) 0.3540(3) -0.4255(4) 0.159(3) Uani 1 d DU . 
H45A H 0.0614 0.3190 -0.3802 0.239 Uiso 1 calc R . 
H45B H 0.0639 0.3835 -0.4639 0.239 Uiso 1 calc R . 
H45C H -0.0734 0.3262 -0.4739 0.239 Uiso 1 calc R . 
C44 C -0.0833(7) 0.4058(3) -0.3607(5) 0.122(2) Uani 1 d DU . 
O44 O -0.2065(7) 0.3959(3) -0.3369(5) 0.193(3) Uani 1 d DU . 
O43 O -0.0115(4) 0.4714(2) -0.3392(3) 0.1169(13) Uani 1 d DU . 
C42 C -0.0883(6) 0.5238(3) -0.2762(3) 0.0946(16) Uani 1 d DU . 
H42A H -0.1972 0.5241 -0.3020 0.113 Uiso 1 calc R . 
H42B H -0.0494 0.5748 -0.2831 0.113 Uiso 1 calc R . 
  
loop_ 
 _atom_site_aniso_label 
 _atom_site_aniso_U_11 
 _atom_site_aniso_U_22 
 _atom_site_aniso_U_33 
 _atom_site_aniso_U_23 
 _atom_site_aniso_U_13 
 _atom_site_aniso_U_12 
C1 0.093(3) 0.053(2) 0.052(2) -0.0083(19) -0.013(2) 0.017(2) 
C17 0.124(5) 0.074(3) 0.079(3) -0.005(3) -0.010(3) 0.036(3) 
O17 0.201(4) 0.103(3) 0.079(2) -0.030(2) -0.040(3) 0.032(3) 
O18 0.138(3) 0.094(2) 0.071(2) 0.0206(19) 0.014(2) 0.036(2) 
C19 0.234(8) 0.147(6) 0.082(4) 0.045(4) 0.042(5) 0.067(6) 
C2 0.077(3) 0.058(2) 0.057(2) 0.0010(19) -0.005(2) 0.009(2) 
C20 0.091(6) 0.076(6) 0.056(5) 0.011(4) -0.010(5) 0.023(5) 
O20 0.108(5) 0.077(4) 0.102(5) -0.041(4) -0.029(5) 0.037(4) 
O21 0.117(5) 0.083(5) 0.073(4) 0.015(4) 0.022(5) 0.030(4) 
C22 0.187(9) 0.098(7) 0.119(7) -0.003(6) 0.049(7) 0.067(7) 
C20' 0.077(11) 0.087(11) 0.067(10) 0.018(8) 0.011(9) 0.010(9) 
O20' 0.091(10) 0.090(11) 0.090(12) 0.031(9) 0.008(8) -0.002(8) 
O21' 0.092(10) 0.117(11) 0.092(9) 0.010(8) -0.001(8) 0.015(8) 
C22' 0.160(16) 0.086(12) 0.105(13) -0.049(10) 0.011(13) 0.052(12) 
C3 0.073(3) 0.051(2) 0.054(2) 0.0049(18) -0.007(2) 0.013(2) 
C4 0.074(3) 0.043(2) 0.058(2) 0.0027(18) -0.007(2) 0.009(2) 
C25 0.132(5) 0.069(3) 0.097(4) -0.031(3) -0.004(3) 0.010(3) 
C24 0.085(4) 0.066(3) 0.072(3) -0.007(2) -0.005(3) -0.015(3) 
O24 0.101(3) 0.082(2) 0.166(4) -0.034(2) -0.007(3) -0.019(2) 
O23 0.078(2) 0.0462(15) 0.0699(19) -0.0067(13) -0.0060(15) 0.0028(14) 
C5 0.069(3) 0.043(2) 0.061(2) 0.0034(18) -0.008(2) 0.002(2) 
C28 0.222(7) 0.084(4) 0.081(4) 0.005(3) 0.050(4) -0.020(4) 
C27 0.115(5) 0.088(4) 0.094(4) 0.006(3) 0.024(4) -0.012(4) 
O27 0.124(4) 0.240(6) 0.120(4) 0.000(4) 0.024(3) -0.054(4) 
O26 0.102(2) 0.0672(19) 0.0610(19) 0.0038(15) 0.0019(17) -0.0077(18) 
C6 0.074(3) 0.052(2) 0.056(2) 0.0005(19) -0.007(2) -0.002(2) 
C31 0.128(5) 0.077(3) 0.091(4) -0.003(3) -0.038(3) 0.028(3) 
C30 0.124(5) 0.050(2) 0.061(3) 0.006(2) -0.011(3) 0.008(3) 
O30 0.159(4) 0.077(2) 0.078(2) 0.0281(18) -0.002(2) -0.009(2) 
O29 0.086(2) 0.0544(16) 0.0725(19) 0.0141(14) -0.0137(16) 0.0010(15) 
C7 0.070(3) 0.044(2) 0.065(3) 0.0041(18) -0.005(2) 0.002(2) 
C8 0.080(3) 0.039(2) 0.066(3) 0.0013(19) -0.001(2) -0.002(2) 
O9 0.0754(19) 0.0437(14) 0.0633(16) 0.0060(13) 0.0007(14) 0.0040(14) 
O10 0.079(2) 0.0441(14) 0.0587(16) -0.0054(12) -0.0167(14) 0.0141(14) 
C11 0.090(4) 0.049(2) 0.044(2) 0.0062(18) -0.007(2) -0.002(2) 
C35 0.124(4) 0.105(4) 0.058(3) 0.006(3) -0.005(3) 0.005(3) 
C34 0.120(4) 0.074(3) 0.063(3) -0.006(3) -0.010(3) -0.006(3) 
O34 0.242(5) 0.110(3) 0.078(2) 0.005(2) -0.029(3) -0.084(3) 
O33 0.107(2) 0.0566(16) 0.0489(15) 0.0030(13) -0.0066(15) -0.0027(16) 
C12 0.071(3) 0.053(2) 0.055(2) 0.0072(19) -0.007(2) 0.001(2) 
C38 0.192(6) 0.084(4) 0.111(4) -0.017(3) 0.023(4) 0.043(4) 
C37 0.123(5) 0.070(3) 0.095(4) -0.002(3) 0.016(4) 0.013(3) 
O37 0.207(5) 0.115(4) 0.218(5) -0.056(4) 0.112(4) -0.040(3) 
O36 0.110(3) 0.0605(18) 0.092(2) -0.0103(16) 0.016(2) 0.0067(18) 
C13 0.091(3) 0.046(2) 0.070(3) -0.004(2) -0.001(2) 0.002(2) 
O39 0.080(2) 0.0576(18) 0.094(2) 0.0202(16) -0.0066(17) 0.0139(16) 
C14 0.075(3) 0.064(3) 0.075(3) 0.004(2) -0.003(2) -0.007(2) 
C15 0.084(3) 0.068(3) 0.054(2) 0.002(2) -0.014(2) -0.001(2) 
O16 0.077(2) 0.0589(16) 0.0518(15) 0.0067(12) -0.0113(14) 0.0048(14) 
C32 0.128(5) 0.046(2) 0.089(4) 0.003(2) 0.015(3) 0.008(3) 
C45 0.233(8) 0.127(5) 0.100(5) -0.033(4) -0.036(5) 0.059(6) 
C44 0.127(6) 0.118(5) 0.109(5) 0.008(4) -0.019(5) -0.009(5) 
O44 0.236(7) 0.174(5) 0.163(5) -0.065(4) 0.014(5) -0.065(5) 
O43 0.148(3) 0.103(3) 0.083(2) 0.007(2) -0.038(2) -0.010(3) 
C42 0.131(4) 0.083(3) 0.060(3) -0.004(3) -0.016(3) 0.025(3) 
  
_geom_special_details 
; 
 All esds (except the esd in the dihedral angle between two l.s. planes) 
 are estimated using the full covariance matrix.  The cell esds are taken 
 into account individually in the estimation of esds in distances, angles 
 and torsion angles; correlations between esds in cell parameters are only 
 used when they are defined by crystal symmetry.  An approximate (isotropic) 
 treatment of cell esds is used for estimating esds involving l.s. planes. 
; 
  
loop_ 
 _geom_bond_atom_site_label_1 
 _geom_bond_atom_site_label_2 
 _geom_bond_distance 
 _geom_bond_site_symmetry_2 
 _geom_bond_publ_flag 
C1 O10 1.424(4) . y 
C1 C17 1.497(4) . y 
C1 C2 1.530(5) . y 
C1 H1 0.9800 . ? 
C17 O17 1.194(4) . y 
C17 O18 1.338(4) . y 
O18 C19 1.478(4) . y 
C19 H19A 0.9600 . ? 
C19 H19B 0.9600 . ? 
C19 H19C 0.9600 . ? 
C2 C20' 1.501(5) . y 
C2 C20 1.513(4) . y 
C2 C3 1.557(5) . y 
C2 H2 0.9800 . ? 
C2 H2' 0.9800 . ? 
C20 O20 1.185(4) . y 
C20 O21 1.337(4) . y 
O21 C22 1.455(4) . y 
C22 H22A 0.9600 . ? 
C22 H22B 0.9600 . ? 
C22 H22C 0.9600 . ? 
C20' O20' 1.187(4) . y 
C20' O21' 1.341(4) . y 
O21' C22' 1.452(5) . y 
C22' H22D 0.9600 . ? 
C22' H22E 0.9600 . ? 
C22' H22F 0.9600 . ? 
C3 C4 1.509(5) . y 
C3 H3A 0.9700 . ? 
C3 H3B 0.9700 . ? 
C4 O9 1.437(4) . y 
C4 C5 1.527(5) . y 
C4 H4 0.9800 . ? 
C25 C24 1.496(4) . y 
C25 H25A 0.9600 . ? 
C25 H25B 0.9600 . ? 
C25 H25C 0.9600 . ? 
C24 O24 1.181(3) . y 
C24 O23 1.340(3) . y 
O23 C5 1.452(3) . y 
C5 C6 1.517(5) . y 
C5 H5 0.9800 . ? 
C28 C27 1.494(4) . y 
C28 H28A 0.9600 . ? 
C28 H28B 0.9600 . ? 
C28 H28C 0.9600 . ? 
C27 O27 1.179(4) . y 
C27 O26 1.329(4) . y 
O26 C6 1.450(3) . y 
C6 C7 1.506(5) . y 
C6 H6 0.9800 . ? 
C31 C30 1.497(4) . y 
C31 H31A 0.9600 . ? 
C31 H31B 0.9600 . ? 
C31 H31C 0.9600 . ? 
C30 O30 1.196(3) . y 
C30 O29 1.350(3) . y 
O29 C7 1.457(3) . y 
C7 C8 1.537(5) . y 
C7 H7 0.9800 . ? 
C8 O9 1.438(4) . y 
C8 C32 1.501(6) . y 
C8 H8 0.9800 . ? 
O10 C11 1.376(5) . y 
C11 O16 1.428(4) . y 
C11 C12 1.486(5) . y 
C11 H11 0.9800 . ? 
C35 C34 1.502(4) . y 
C35 H35A 0.9600 . ? 
C35 H35B 0.9600 . ? 
C35 H35C 0.9600 . ? 
C34 O34 1.182(3) . y 
C34 O33 1.339(3) . y 
O33 C12 1.447(3) . y 
C12 C13 1.514(5) . y 
C12 H12 0.9800 . ? 
C38 C37 1.497(4) . y 
C38 H38A 0.9600 . ? 
C38 H38B 0.9600 . ? 
C38 H38C 0.9600 . ? 
C37 O37 1.179(4) . y 
C37 O36 1.323(4) . y 
O36 C13 1.450(3) . y 
C13 C14 1.519(5) . y 
C13 H13 0.9800 . ? 
C41 C40 1.502(4) . y 
C41 H41A 0.9600 . ? 
C41 H41B 0.9600 . ? 
C41 H41C 0.9600 . ? 
C40 O40 1.188(4) . y 
C40 O39 1.346(4) . y 
O39 C40" 1.329(4) . y 
O39 C40' 1.353(4) . y 
O39 C14 1.453(3) . y 
C14 C15 1.537(6) . y 
C14 H14 0.9800 . ? 
C41' C40' 1.496(5) . y 
C41' H41D 0.9600 . ? 
C41' H41E 0.9600 . ? 
C41' H41F 0.9600 . ? 
C40' O40' 1.189(4) . y 
C41" C40" 1.505(4) . y 
C41" H41G 0.9600 . ? 
C41" H41H 0.9600 . ? 
C41" H41I 0.9600 . ? 
C40" O40" 1.182(4) . y 
C15 O16 1.426(5) . y 
C15 C42 1.522(5) . y 
C15 H15 0.9800 . ? 
C32 H32A 0.9600 . ? 
C32 H32B 0.9600 . ? 
C32 H32C 0.9600 . ? 
C45 C44 1.500(4) . y 
C45 H45A 0.9600 . ? 
C45 H45B 0.9600 . ? 
C45 H45C 0.9600 . ? 
C44 O44 1.189(4) . y 
C44 O43 1.326(4) . y 
O43 C42 1.461(4) . y 
C42 H42A 0.9700 . ? 
C42 H42B 0.9700 . ? 
  
loop_ 
 _geom_angle_atom_site_label_1 
 _geom_angle_atom_site_label_2 
 _geom_angle_atom_site_label_3 
 _geom_angle 
 _geom_angle_site_symmetry_1 
 _geom_angle_site_symmetry_3 
 _geom_angle_publ_flag 
O10 C1 C17 111.9(3) . . y 
O10 C1 C2 107.0(3) . . y 
C17 C1 C2 114.0(4) . . y 
O10 C1 H1 107.9 . . ? 
C17 C1 H1 107.9 . . ? 
C2 C1 H1 107.9 . . ? 
O17 C17 O18 123.4(4) . . y 
O17 C17 C1 126.4(4) . . y 
O18 C17 C1 110.1(3) . . y 
C17 O18 C19 111.7(4) . . y 
O18 C19 H19A 109.5 . . ? 
O18 C19 H19B 109.5 . . ? 
H19A C19 H19B 109.5 . . ? 
O18 C19 H19C 109.5 . . ? 
H19A C19 H19C 109.5 . . ? 
H19B C19 H19C 109.5 . . ? 
C20' C2 C1 122.7(9) . . y 
C20 C2 C1 104.2(4) . . y 
C20' C2 C3 114.4(11) . . y 
C20 C2 C3 111.4(5) . . y 
C1 C2 C3 108.2(3) . . y 
C20 C2 H2 110.9 . . ? 
C1 C2 H2 110.9 . . ? 
C3 C2 H2 110.9 . . ? 
C20' C2 H2' 102.9 . . ? 
C1 C2 H2' 102.9 . . ? 
C3 C2 H2' 102.9 . . ? 
O20 C20 O21 123.8(5) . . y 
O20 C20 C2 125.8(5) . . y 
O21 C20 C2 110.4(4) . . y 
C20 O21 C22 117.8(5) . . y 
O21 C22 H22A 109.5 . . ? 
O21 C22 H22B 109.5 . . ? 
H22A C22 H22B 109.5 . . ? 
O21 C22 H22C 109.5 . . ? 
H22A C22 H22C 109.5 . . ? 
H22B C22 H22C 109.5 . . ? 
O20' C20' O21' 122.7(6) . . y 
O20' C20' C2 127.1(7) . . y 
O21' C20' C2 110.0(5) . . y 
C20' O21' C22' 115.4(7) . . y 
O21' C22' H22D 109.5 . . ? 
O21' C22' H22E 109.5 . . ? 
H22D C22' H22E 109.5 . . ? 
O21' C22' H22F 109.5 . . ? 
H22D C22' H22F 109.5 . . ? 
H22E C22' H22F 109.5 . . ? 
C4 C3 C2 114.1(3) . . y 
C4 C3 H3A 108.7 . . ? 
C2 C3 H3A 108.7 . . ? 
C4 C3 H3B 108.7 . . ? 
C2 C3 H3B 108.7 . . ? 
H3A C3 H3B 107.6 . . ? 
O9 C4 C3 112.4(3) . . y 
O9 C4 C5 107.8(3) . . y 
C3 C4 C5 115.3(3) . . y 
O9 C4 H4 106.9 . . ? 
C3 C4 H4 106.9 . . ? 
C5 C4 H4 106.9 . . ? 
C24 C25 H25A 109.5 . . ? 
C24 C25 H25B 109.5 . . ? 
H25A C25 H25B 109.5 . . ? 
C24 C25 H25C 109.5 . . ? 
H25A C25 H25C 109.5 . . ? 
H25B C25 H25C 109.5 . . ? 
O24 C24 O23 123.7(4) . . y 
O24 C24 C25 125.1(4) . . y 
O23 C24 C25 111.1(3) . . y 
C24 O23 C5 117.4(3) . . y 
O23 C5 C6 106.9(3) . . y 
O23 C5 C4 110.2(3) . . y 
C6 C5 C4 110.8(3) . . y 
O23 C5 H5 109.7 . . ? 
C6 C5 H5 109.7 . . ? 
C4 C5 H5 109.7 . . ? 
C27 C28 H28A 109.5 . . ? 
C27 C28 H28B 109.5 . . ? 
H28A C28 H28B 109.5 . . ? 
C27 C28 H28C 109.5 . . ? 
H28A C28 H28C 109.5 . . ? 
H28B C28 H28C 109.5 . . ? 
O27 C27 O26 122.6(4) . . y 
O27 C27 C28 126.7(4) . . y 
O26 C27 C28 110.7(4) . . y 
C27 O26 C6 117.8(3) . . y 
O26 C6 C7 109.2(3) . . y 
O26 C6 C5 106.9(3) . . y 
C7 C6 C5 111.1(3) . . y 
O26 C6 H6 109.9 . . ? 
C7 C6 H6 109.9 . . ? 
C5 C6 H6 109.9 . . ? 
C30 C31 H31A 109.5 . . ? 
C30 C31 H31B 109.5 . . ? 
H31A C31 H31B 109.5 . . ? 
C30 C31 H31C 109.5 . . ? 
H31A C31 H31C 109.5 . . ? 
H31B C31 H31C 109.5 . . ? 
O30 C30 O29 123.6(4) . . y 
O30 C30 C31 125.5(4) . . y 
O29 C30 C31 110.9(3) . . y 
C30 O29 C7 116.1(3) . . y 
O29 C7 C6 108.5(3) . . y 
O29 C7 C8 108.1(3) . . y 
C6 C7 C8 109.3(3) . . y 
O29 C7 H7 110.3 . . ? 
C6 C7 H7 110.3 . . ? 
C8 C7 H7 110.3 . . ? 
O9 C8 C32 107.2(4) . . y 
O9 C8 C7 110.2(3) . . y 
C32 C8 C7 113.5(3) . . y 
O9 C8 H8 108.6 . . ? 
C32 C8 H8 108.6 . . ? 
C7 C8 H8 108.6 . . ? 
C4 O9 C8 114.3(3) . . y 
C11 O10 C1 116.0(3) . . y 
O10 C11 O16 108.1(3) . . y 
O10 C11 C12 108.4(3) . . y 
O16 C11 C12 110.0(3) . . y 
O10 C11 H11 110.1 . . ? 
O16 C11 H11 110.1 . . ? 
C12 C11 H11 110.1 . . ? 
C34 C35 H35A 109.5 . . ? 
C34 C35 H35B 109.5 . . ? 
H35A C35 H35B 109.5 . . ? 
C34 C35 H35C 109.5 . . ? 
H35A C35 H35C 109.5 . . ? 
H35B C35 H35C 109.5 . . ? 
O34 C34 O33 123.3(4) . . y 
O34 C34 C35 125.8(4) . . y 
O33 C34 C35 110.9(3) . . y 
C34 O33 C12 119.3(3) . . y 
O33 C12 C11 107.0(3) . . y 
O33 C12 C13 106.6(3) . . y 
C11 C12 C13 111.1(3) . . y 
O33 C12 H12 110.7 . . ? 
C11 C12 H12 110.7 . . ? 
C13 C12 H12 110.7 . . ? 
C37 C38 H38A 109.5 . . ? 
C37 C38 H38B 109.5 . . ? 
H38A C38 H38B 109.5 . . ? 
C37 C38 H38C 109.5 . . ? 
H38A C38 H38C 109.5 . . ? 
H38B C38 H38C 109.5 . . ? 
O37 C37 O36 123.1(4) . . y 
O37 C37 C38 125.4(5) . . y 
O36 C37 C38 111.5(4) . . y 
C37 O36 C13 117.6(3) . . y 
O36 C13 C12 106.9(3) . . y 
O36 C13 C14 108.9(3) . . y 
C12 C13 C14 113.7(4) . . y 
O36 C13 H13 109.1 . . ? 
C12 C13 H13 109.1 . . ? 
C14 C13 H13 109.1 . . ? 
C40 C41 H41A 109.5 . . ? 
C40 C41 H41B 109.5 . . ? 
H41A C41 H41B 109.5 . . ? 
C40 C41 H41C 109.5 . . ? 
H41A C41 H41C 109.5 . . ? 
H41B C41 H41C 109.5 . . ? 
O40 C40 O39 121.6(5) . . y 
O40 C40 C41 123.3(7) . . y 
O39 C40 C41 110.6(5) . . y 
C40" O39 C14 119.9(4) . . y 
C40 O39 C14 117.3(3) . . y 
C40' O39 C14 116.1(4) . . y 
O39 C14 C13 108.9(3) . . y 
O39 C14 C15 108.8(3) . . y 
C13 C14 C15 108.4(3) . . y 
O39 C14 H14 110.2 . . ? 
C13 C14 H14 110.2 . . ? 
C15 C14 H14 110.2 . . ? 
C40' C41' H41D 109.5 . . ? 
C40' C41' H41E 109.5 . . ? 
H41D C41' H41E 109.5 . . ? 
C40' C41' H41F 109.5 . . ? 
H41D C41' H41F 109.5 . . ? 
H41E C41' H41F 109.5 . . ? 
O40' C40' O39 121.1(5) . . y 
O40' C40' C41' 125.3(7) . . y 
O39 C40' C41' 110.7(5) . . y 
C40" C41" H41G 109.5 . . ? 
C40" C41" H41H 109.5 . . ? 
H41G C41" H41H 109.5 . . ? 
C40" C41" H41I 109.5 . . ? 
H41G C41" H41I 109.5 . . ? 
H41H C41" H41I 109.5 . . ? 
O40" C40" O39 124.0(6) . . y 
O40" C40" C41" 124.8(6) . . y 
O39 C40" C41" 111.2(5) . . y 
O16 C15 C42 106.7(4) . . y 
O16 C15 C14 110.0(3) . . y 
C42 C15 C14 110.3(3) . . y 
O16 C15 H15 109.9 . . ? 
C42 C15 H15 109.9 . . ? 
C14 C15 H15 109.9 . . ? 
C15 O16 C11 112.2(3) . . y 
C8 C32 H32A 109.5 . . ? 
C8 C32 H32B 109.5 . . ? 
H32A C32 H32B 109.5 . . ? 
C8 C32 H32C 109.5 . . ? 
H32A C32 H32C 109.5 . . ? 
H32B C32 H32C 109.5 . . ? 
C44 C45 H45A 109.5 . . ? 
C44 C45 H45B 109.5 . . ? 
H45A C45 H45B 109.5 . . ? 
C44 C45 H45C 109.5 . . ? 
H45A C45 H45C 109.5 . . ? 
H45B C45 H45C 109.5 . . ? 
O44 C44 O43 120.2(5) . . y 
O44 C44 C45 126.7(5) . . y 
O43 C44 C45 112.8(4) . . y 
C44 O43 C42 114.7(4) . . y 
O43 C42 C15 110.7(3) . . y 
O43 C42 H42A 109.5 . . ? 
C15 C42 H42A 109.5 . . ? 
O43 C42 H42B 109.5 . . ? 
C15 C42 H42B 109.5 . . ? 
H42A C42 H42B 108.1 . . ? 
  
loop_ 
 _geom_torsion_atom_site_label_1 
 _geom_torsion_atom_site_label_2 
 _geom_torsion_atom_site_label_3 
 _geom_torsion_atom_site_label_4 
 _geom_torsion 
 _geom_torsion_site_symmetry_1 
 _geom_torsion_site_symmetry_2 
 _geom_torsion_site_symmetry_3 
 _geom_torsion_site_symmetry_4 
 _geom_torsion_publ_flag 
 O10 C1 C17 O17 -116.6(6) . . . . y 
 C2 C1 C17 O17 121.7(6) . . . . y 
 O10 C1 C17 O18 66.2(5) . . . . y 
 C2 C1 C17 O18 -55.4(5) . . . . y 
 O17 C17 O18 C19 6.3(7) . . . . y 
 C1 C17 O18 C19 -176.4(4) . . . . y 
 O10 C1 C2 C20' -161.3(10) . . . . y 
 C17 C1 C2 C20' -36.9(11) . . . . y 
 O10 C1 C2 C20 -179.4(4) . . . . y 
 C17 C1 C2 C20 -55.1(5) . . . . y 
 O10 C1 C2 C3 62.0(4) . . . . y 
 C17 C1 C2 C3 -173.7(3) . . . . y 
 C20' C2 C20 O20 173(4) . . . . y 
 C1 C2 C20 O20 -45.9(11) . . . . y 
 C3 C2 C20 O20 70.5(11) . . . . y 
 C20' C2 C20 O21 -7(3) . . . . y 
 C1 C2 C20 O21 134.1(7) . . . . y 
 C3 C2 C20 O21 -109.5(8) . . . . y 
 O20 C20 O21 C22 -5.2(16) . . . . y 
 C2 C20 O21 C22 174.8(8) . . . . y 
 C20 C2 C20' O20' 178(6) . . . . y 
 C1 C2 C20' O20' 132(2) . . . . y 
 C3 C2 C20' O20' -94(3) . . . . y 
 C20 C2 C20' O21' 3(2) . . . . y 
 C1 C2 C20' O21' -43(3) . . . . y 
 C3 C2 C20' O21' 91(2) . . . . y 
 O20' C20' O21' C22' 3(5) . . . . y 
 C2 C20' O21' C22' 178(2) . . . . y 
 C20' C2 C3 C4 30.0(5) . . . . y 
 C20 C2 C3 C4 56.8(5) . . . . y 
 C1 C2 C3 C4 170.8(3) . . . . y 
 C2 C3 C4 O9 -66.0(4) . . . . y 
 C2 C3 C4 C5 169.8(3) . . . . y 
 O24 C24 O23 C5 1.8(7) . . . . y 
 C25 C24 O23 C5 -175.5(3) . . . . y 
 C24 O23 C5 C6 142.4(3) . . . . y 
 C24 O23 C5 C4 -97.2(4) . . . . y 
 O9 C4 C5 O23 -174.8(3) . . . . y 
 C3 C4 C5 O23 -48.3(4) . . . . y 
 O9 C4 C5 C6 -56.8(4) . . . . y 
 C3 C4 C5 C6 69.8(4) . . . . y 
 O27 C27 O26 C6 -5.9(8) . . . . y 
 C28 C27 O26 C6 171.8(4) . . . . y 
 C27 O26 C6 C7 -91.1(5) . . . . y 
 C27 O26 C6 C5 148.6(4) . . . . y 
 O23 C5 C6 O26 -65.3(4) . . . . y 
 C4 C5 C6 O26 174.7(3) . . . . y 
 O23 C5 C6 C7 175.7(3) . . . . y 
 C4 C5 C6 C7 55.7(4) . . . . y 
 O30 C30 O29 C7 4.5(6) . . . . y 
 C31 C30 O29 C7 -176.1(4) . . . . y 
 C30 O29 C7 C6 102.6(4) . . . . y 
 C30 O29 C7 C8 -139.0(3) . . . . y 
 O26 C6 C7 O29 -53.4(4) . . . . y 
 C5 C6 C7 O29 64.2(4) . . . . y 
 O26 C6 C7 C8 -171.1(3) . . . . y 
 C5 C6 C7 C8 -53.5(4) . . . . y 
 O29 C7 C8 O9 -63.2(4) . . . . y 
 C6 C7 C8 O9 54.8(4) . . . . y 
 O29 C7 C8 C32 57.1(5) . . . . y 
 C6 C7 C8 C32 175.0(4) . . . . y 
 C3 C4 O9 C8 -67.2(4) . . . . y 
 C5 C4 O9 C8 61.0(4) . . . . y 
 C32 C8 O9 C4 175.1(3) . . . . y 
 C7 C8 O9 C4 -60.9(4) . . . . y 
 C17 C1 O10 C11 71.5(4) . . . . y 
 C2 C1 O10 C11 -162.9(3) . . . . y 
 C1 O10 C11 O16 -78.1(4) . . . . y 
 C1 O10 C11 C12 162.7(3) . . . . y 
 O34 C34 O33 C12 1.5(8) . . . . y 
 C35 C34 O33 C12 179.5(4) . . . . y 
 C34 O33 C12 C11 126.4(4) . . . . y 
 C34 O33 C12 C13 -114.7(4) . . . . y 
 O10 C11 C12 O33 -71.9(4) . . . . y 
 O16 C11 C12 O33 170.1(3) . . . . y 
 O10 C11 C12 C13 172.2(3) . . . . y 
 O16 C11 C12 C13 54.2(4) . . . . y 
 O37 C37 O36 C13 -1.0(9) . . . . y 
 C38 C37 O36 C13 179.6(4) . . . . y 
 C37 O36 C13 C12 -128.7(4) . . . . y 
 C37 O36 C13 C14 108.0(5) . . . . y 
 O33 C12 C13 O36 74.6(4) . . . . y 
 C11 C12 C13 O36 -169.3(3) . . . . y 
 O33 C12 C13 C14 -165.2(3) . . . . y 
 C11 C12 C13 C14 -49.1(4) . . . . y 
 O40 C40 O39 C40" -109(2) . . . . y 
 C41 C40 O39 C40" 94.1(12) . . . . y 
 O40 C40 O39 C40' 84.3(19) . . . . y 
 C41 C40 O39 C40' -72.6(17) . . . . y 
 O40 C40 O39 C14 -6.2(19) . . . . y 
 C41 C40 O39 C14 -163.2(8) . . . . y 
 C40" O39 C14 C13 -96.0(11) . . . . y 
 C40 O39 C14 C13 -123.2(8) . . . . y 
 C40' O39 C14 C13 -142.7(8) . . . . y 
 C40" O39 C14 C15 145.9(11) . . . . y 
 C40 O39 C14 C15 118.8(8) . . . . y 
 C40' O39 C14 C15 99.2(9) . . . . y 
 O36 C13 C14 O39 49.2(5) . . . . y 
 C12 C13 C14 O39 -69.9(4) . . . . y 
 O36 C13 C14 C15 167.5(3) . . . . y 
 C12 C13 C14 C15 48.4(4) . . . . y 
 C40" O39 C40' O40' -109.5(18) . . . . y 
 C40 O39 C40' O40' -101(2) . . . . y 
 C14 O39 C40' O40' -3.1(19) . . . . y 
 C40" O39 C40' C41' 52.3(11) . . . . y 
 C40 O39 C40' C41' 60.5(14) . . . . y 
 C14 O39 C40' C41' 158.7(10) . . . . y 
 C40 O39 C40" O40" 90(2) . . . . y 
 C40' O39 C40" O40" 96(2) . . . . y 
 C14 O39 C40" O40" -1(3) . . . . y 
 C40 O39 C40" C41" -90.8(18) . . . . y 
 C40' O39 C40" C41" -84.8(16) . . . . y 
 C14 O39 C40" C41" 178.8(12) . . . . y 
 O39 C14 C15 O16 63.6(4) . . . . y 
 C13 C14 C15 O16 -54.8(4) . . . . y 
 O39 C14 C15 C42 -53.9(5) . . . . y 
 C13 C14 C15 C42 -172.2(4) . . . . y 
 C42 C15 O16 C11 -175.8(3) . . . . y 
 C14 C15 O16 C11 64.6(4) . . . . y 
 O10 C11 O16 C15 177.9(3) . . . . y 
 C12 C11 O16 C15 -63.9(4) . . . . y 
 O44 C44 O43 C42 6.2(10) . . . . y 
 C45 C44 O43 C42 180.0(4) . . . . y 
 C44 O43 C42 C15 77.7(6) . . . . y 
 O16 C15 C42 O43 54.8(5) . . . . y 
 C14 C15 C42 O43 174.3(4) . . . . y 
  
  
  
_refine_diff_density_max          0.174 
_refine_diff_density_min          -0.161 
_refine_diff_density_rms          0.037 
